# Supplementary material for: Mechanism of water oxidation by nanolayered manganese oxide: a step forward
Source: Royal Society of Chemistry journal article supplement (doi:10.1039/c3ra46925e), 2013-12-24
Supplement: c3ra46925e.pdf [file c3ra46925e.pdf]

# Electronic Supplementary Information

# Mechanism of water oxidation by nanolayered manganese oxide: a step forward

Mohammad Mahdi Najafpour<sup>\*a,b</sup> and Mohsen Abbasi Isaloo<sup>a</sup>

<sup>a</sup>*Department of Chemistry, Institute for Advanced Studies in Basic Sciences (IASBS), Zanzan, 45137-66731, Iran*

<sup>b</sup>*Center of Climate Change and Global Warming, Institute for Advanced Studies in Basic Sciences (IASBS), Zanzan, 45137-66731, Iran*

<sup>\*</sup>*Corresponding author; Phone: (+98) 241 415 3201; E-mail: [mmnajafpour@iasbs.ac.ir](mailto:mmnajafpour@iasbs.ac.ir)*

## Table of Contents

|                                                                                                                                             | Page         |
|---------------------------------------------------------------------------------------------------------------------------------------------|--------------|
| <b>Experimental section</b>                                                                                                                 | <b>4</b>     |
| <b>S1 Set up for finding the rate of exchange for <math>\mu</math>-O on the surface of layered Mn oxides</b>                                | <b>5</b>     |
| <b>TEM images of layered Mn-K</b>                                                                                                           | <b>6</b>     |
| <b>SEM images of layered Mn-K</b>                                                                                                           | <b>7</b>     |
| <b>Diffuse reflectance infrared Fourier transform spectrum of layered Mn-K.</b>                                                             | <b>8</b>     |
| <b>XRD of layered Mn-K prepared at 200 °C</b>                                                                                               | <b>9</b>     |
| <b>O<sub>2</sub> evolution</b>                                                                                                              | <b>10</b>    |
| <b>Different motifs are formed by adding H<sub>2</sub><sup>18</sup>O to nanolayered Mn-K oxide</b>                                          | <b>11</b>    |
| <b>DRIFT spectra of reference compound (black) and reference compound after one week</b>                                                    | <b>12-21</b> |
| <b>Measured standard reduction potentials in aqueous solution (pH = 0) for water oxidation regarding different mechanisms (E0 vs. SHE).</b> | <b>22</b>    |
| <b>References</b>                                                                                                                           | <b>23</b>    |

## Material and methods

All reagents and solvents were purchased from commercial sources and were used without further purification.  $\text{H}_2^{18}\text{O}$  (97%) was purchased from Aldrich. The oxide was synthesized by previously reported method (ref. S1).

## Procedure

0.25 mL  $\text{H}_2^{18}\text{O}$  (97%) was added to 125 mg K-Mn oxide in a small test tube. After different times, a few amounts of oxide were separated, added to  $\text{Et}_2\text{O}$  to remove water and stop water exchange, and dried under vacuum at room temperature (Scheme S1). As the reference compound, we used similar procedure by K-Mn oxide and treated it by  $\text{H}_2^{16}\text{O}$ .

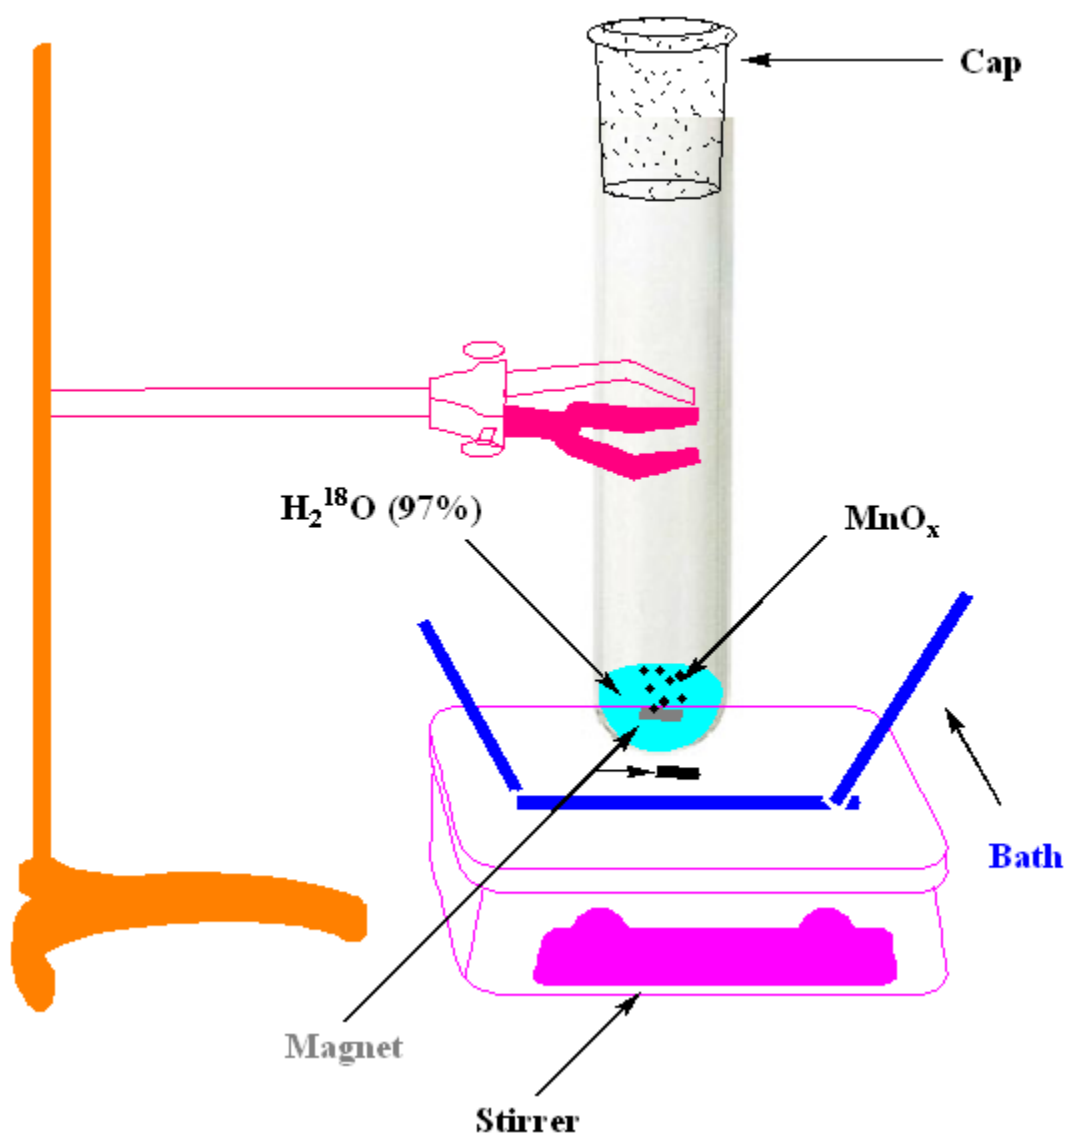

Scheme S1 Set up for finding the rate of exchange for  $\mu$ -O on the surface of layered Mn oxide by diffuse reflectance infrared Fourier transform spectroscopy.

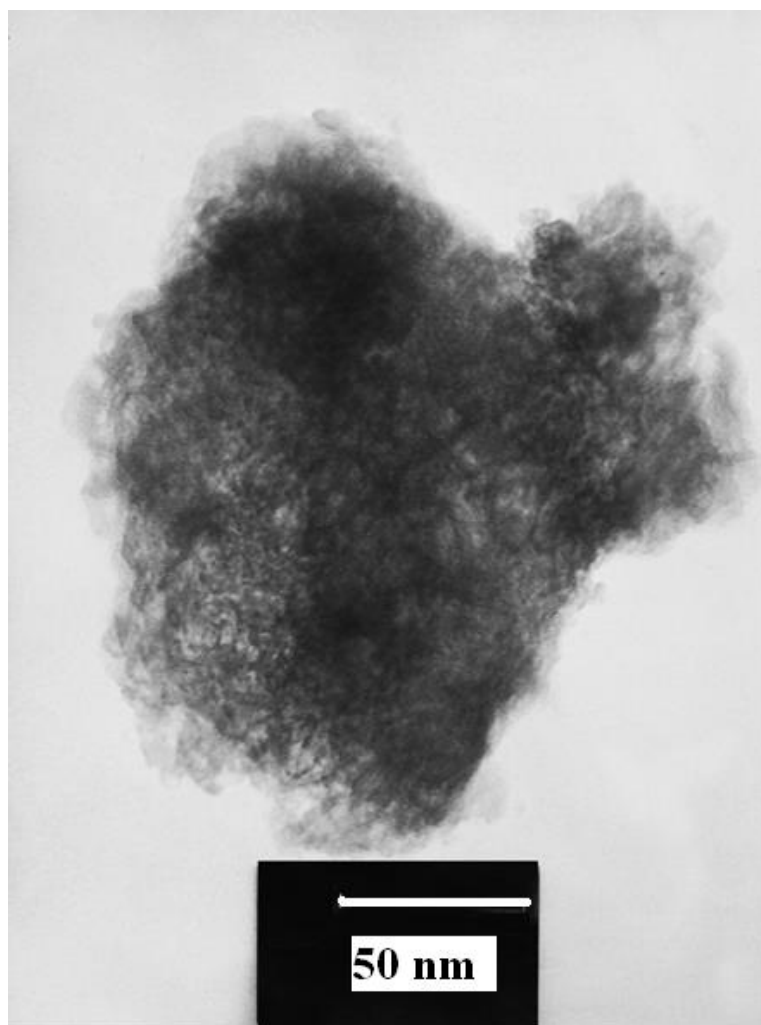

a

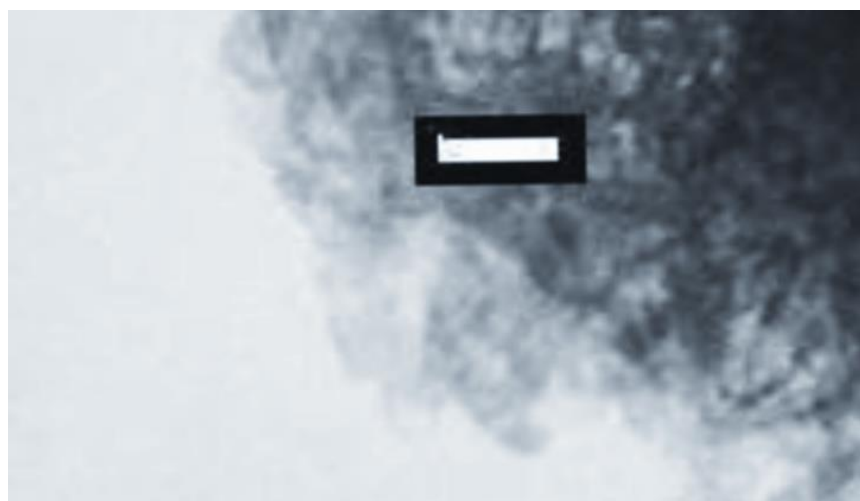

b

Fig. S1 TEM images of nanolayered Mn-K. Scale bar in b is 12 nm.

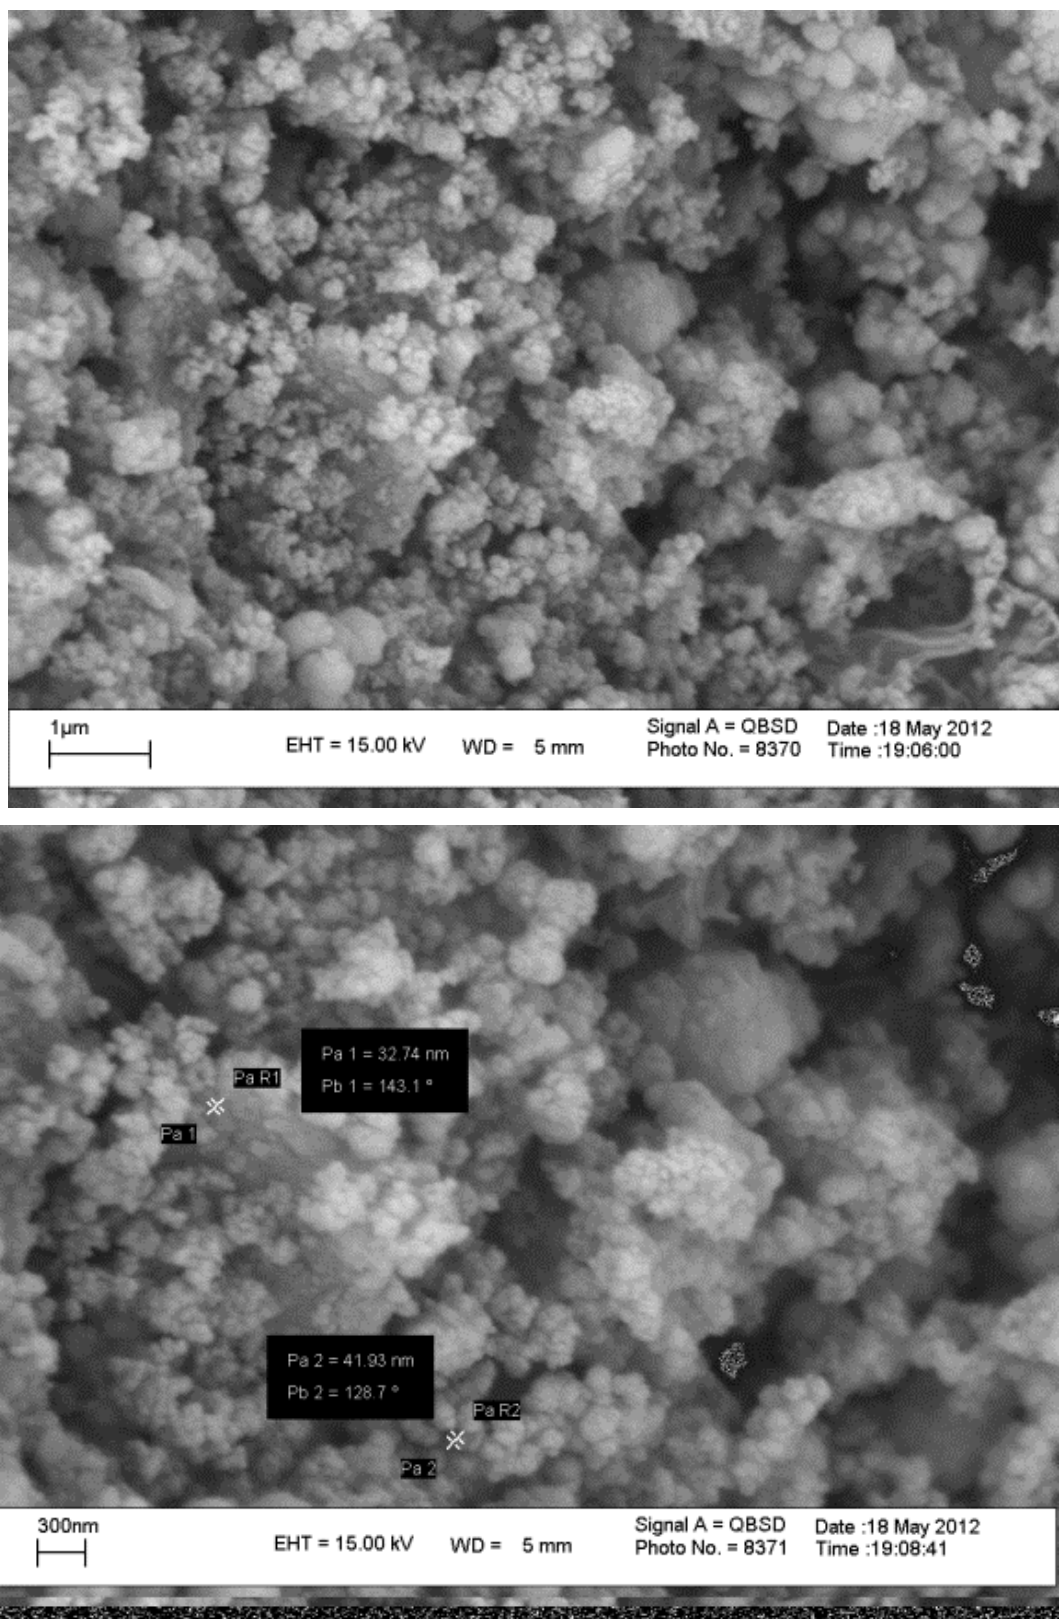

Fig. S2 SEM images of nanolayered Mn-K.

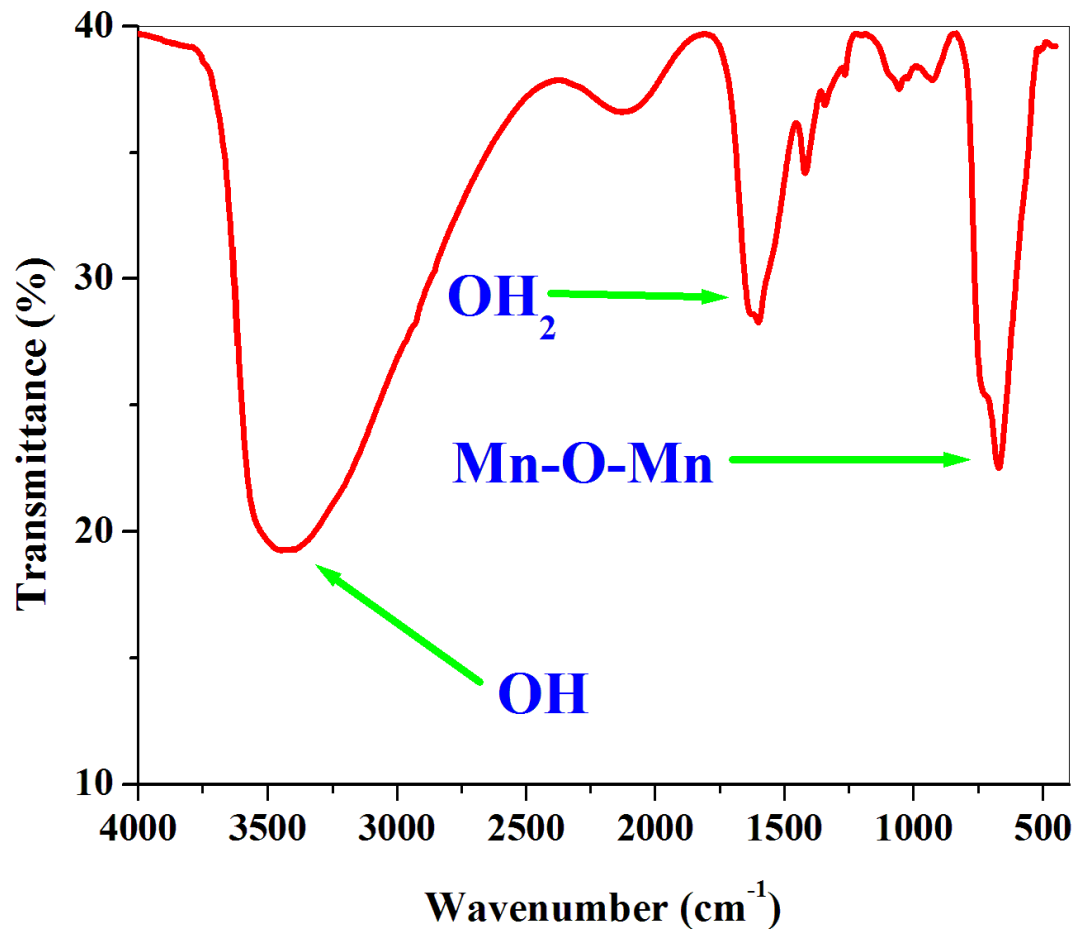

Fig. S3 Diffuse reflectance infrared Fourier transform spectrum of nanolayered Mn-K.

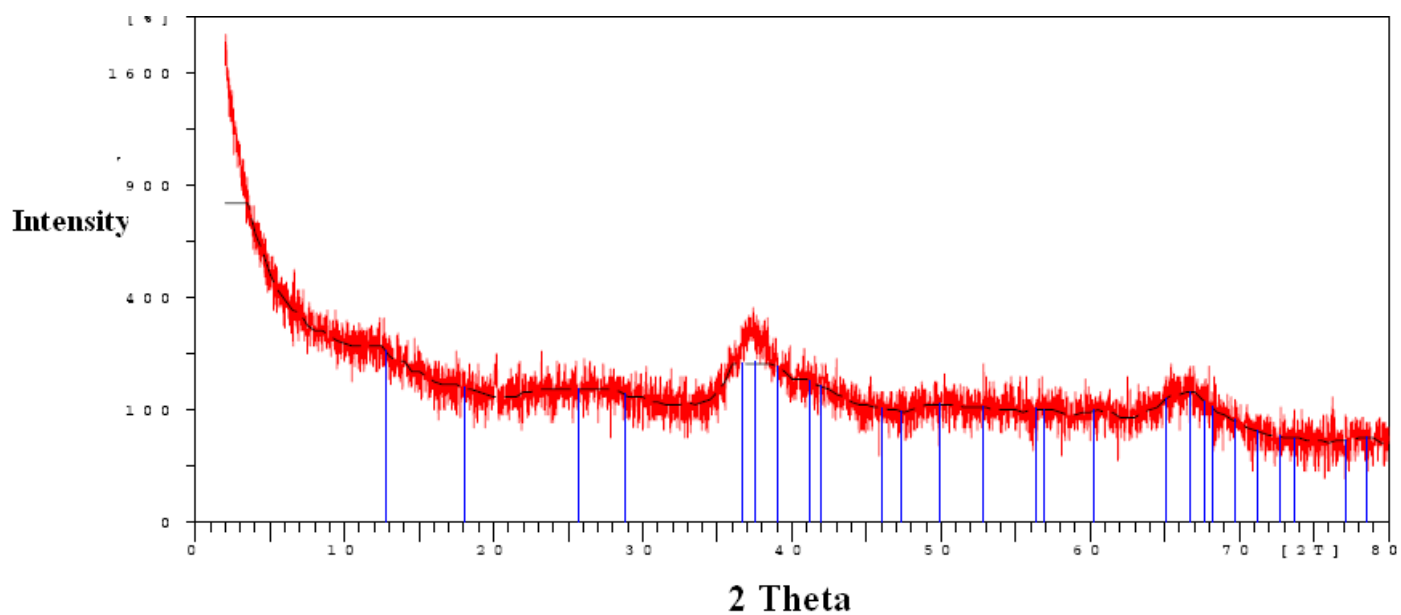

Fig. S4 XRD of nanolayered Mn-K prepared at 200 °C.

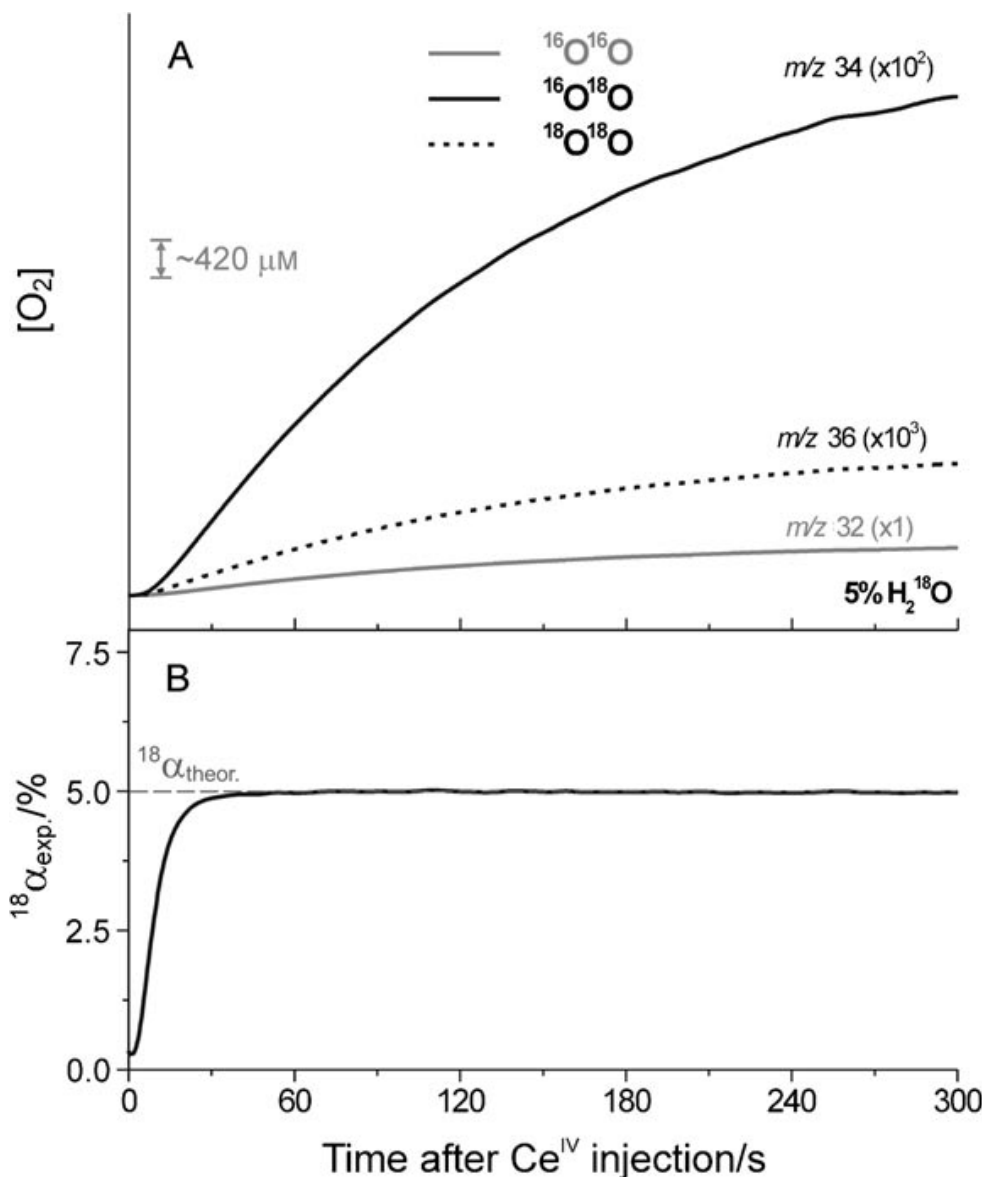

Fig. S5 A: Oxygen evolution traces for the reaction of layered Mn oxide with Ce(IV) detected by MIMS for  $^{16}O_2$  ( $m/z$ : 32; solid grey trace),  $^{16}O^{18}O$  ( $m/z$ : 34; solid black trace), and  $^{18}O_2$  ( $m/z$ :36; black dashed trace). Ce(IV) in  $H_2^{18}O$  enriched water was injected into the (non-enriched) oxide suspension at  $t = 0$  s. Final oxide and Ce(IV) concentrations in the MIMS cell were  $1 \text{ mgmL}^{-1}$  and 100 mm, respectively.  $H_2^{18}O$  enrichment of the reaction mixture: 5%. The absolute scale refers to an amplification factor of 1. B: Change in  $^{18}\alpha$  value as a function of time calculated from the traces shown in A. Image and caption are from ref. S2.

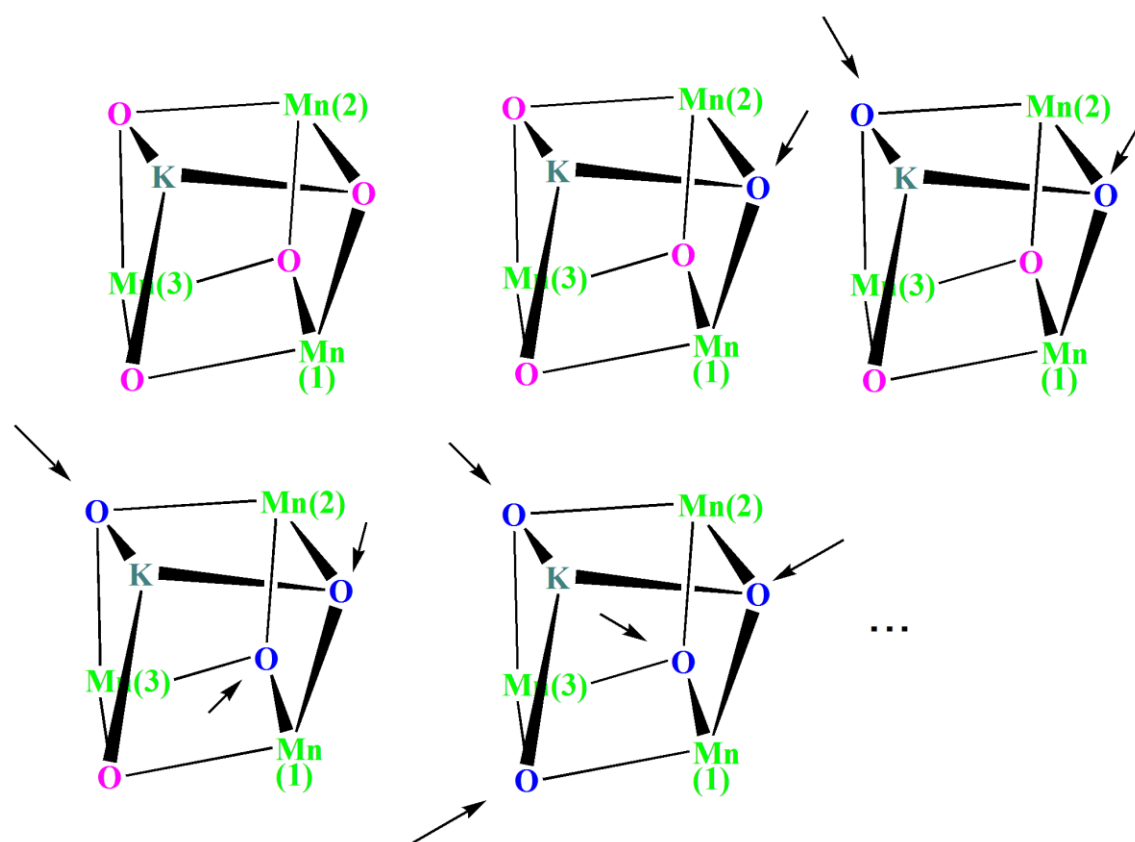

Fig. S6 Different motifs are formed by adding  $\text{H}_2^{18}\text{O}$  to nanolayered Mn-K oxide. Each motif may different DRIFT peak in Mn-O-Mn area. Arrows show isotopic oxygen in the structure.

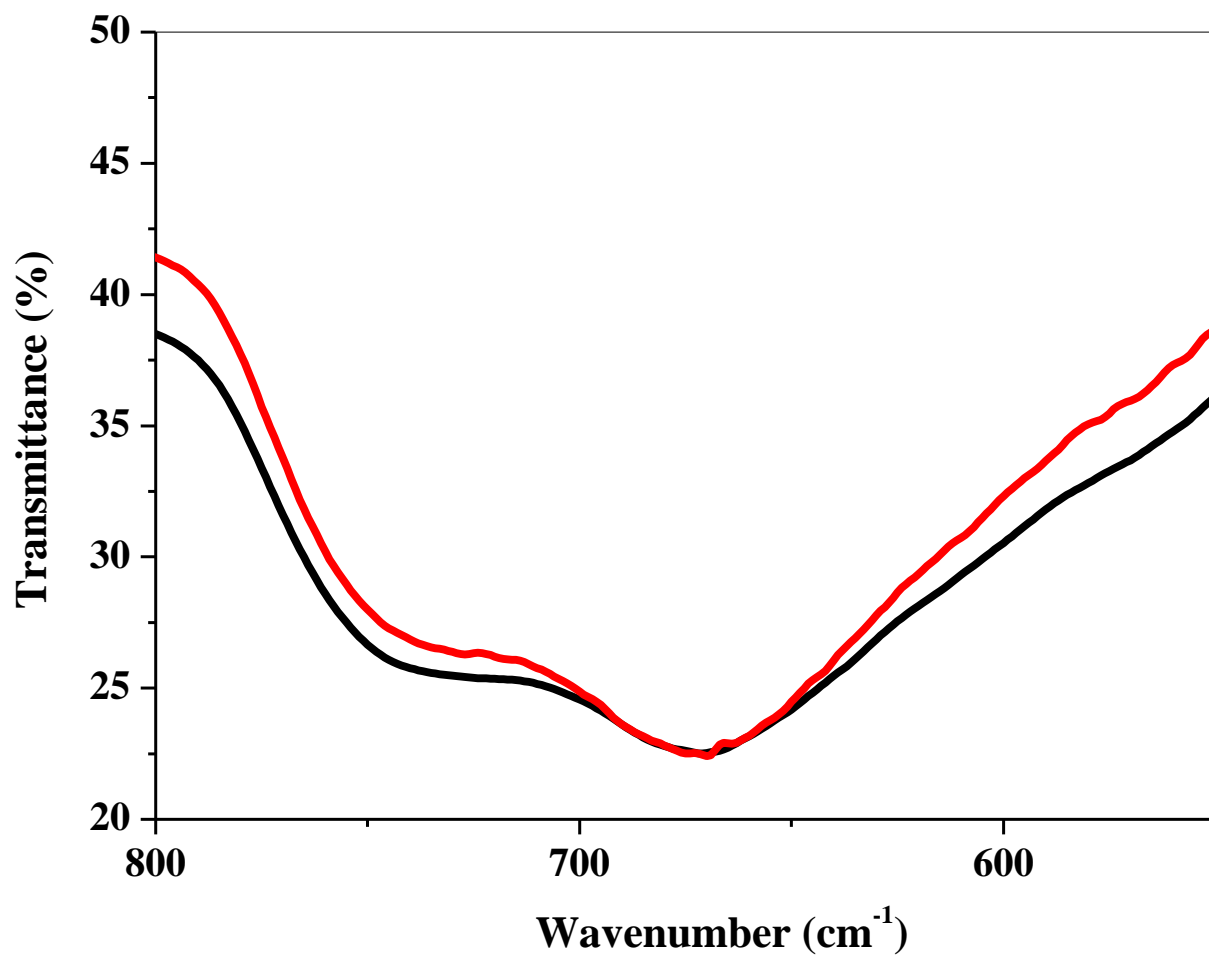

Fig. S7 DRIFT spectra of reference compound (black) and reference compound after 30 s (red).

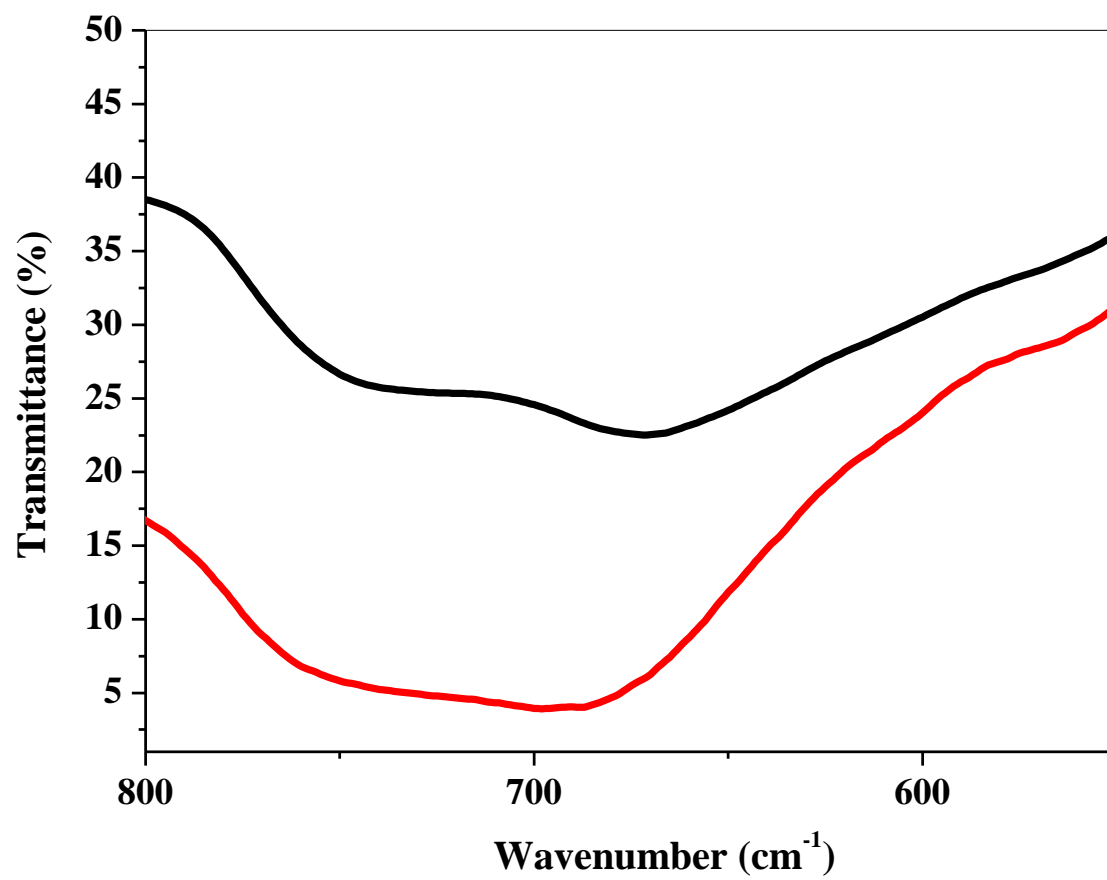

Fig. S8 DRIFT spectra of reference compound (black) and reference compound after 60 s (red).

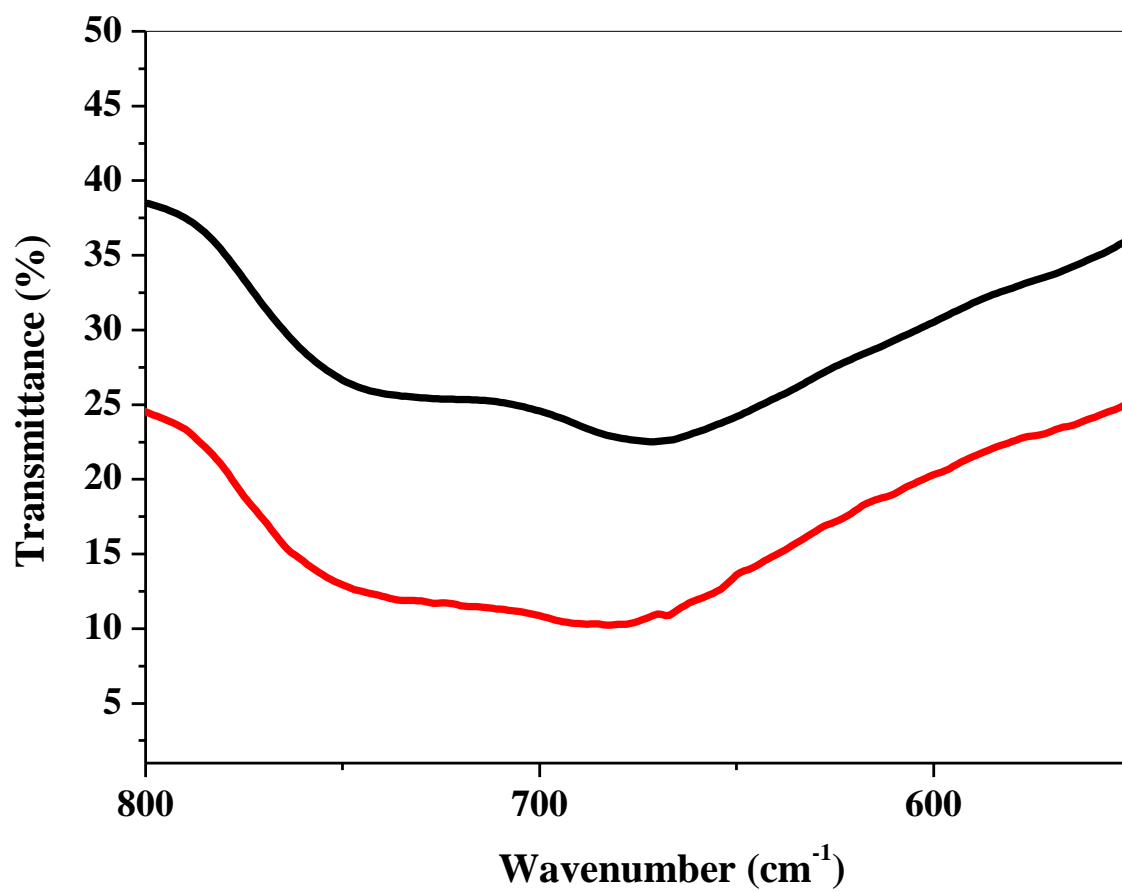

Fig. S8 DRIFT spectra of reference compound (black) and reference compound after 90 s (red).

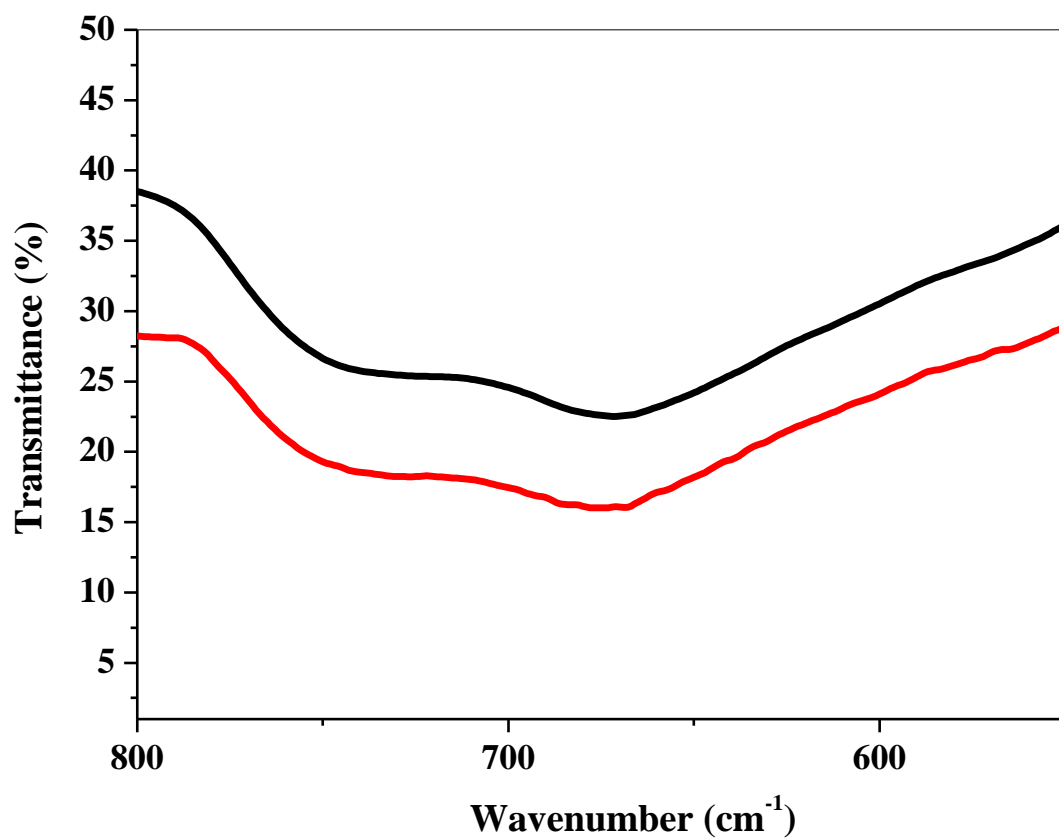

Fig. S9 DRIFT spectra of reference compound (black) and reference compound after 120 (red).

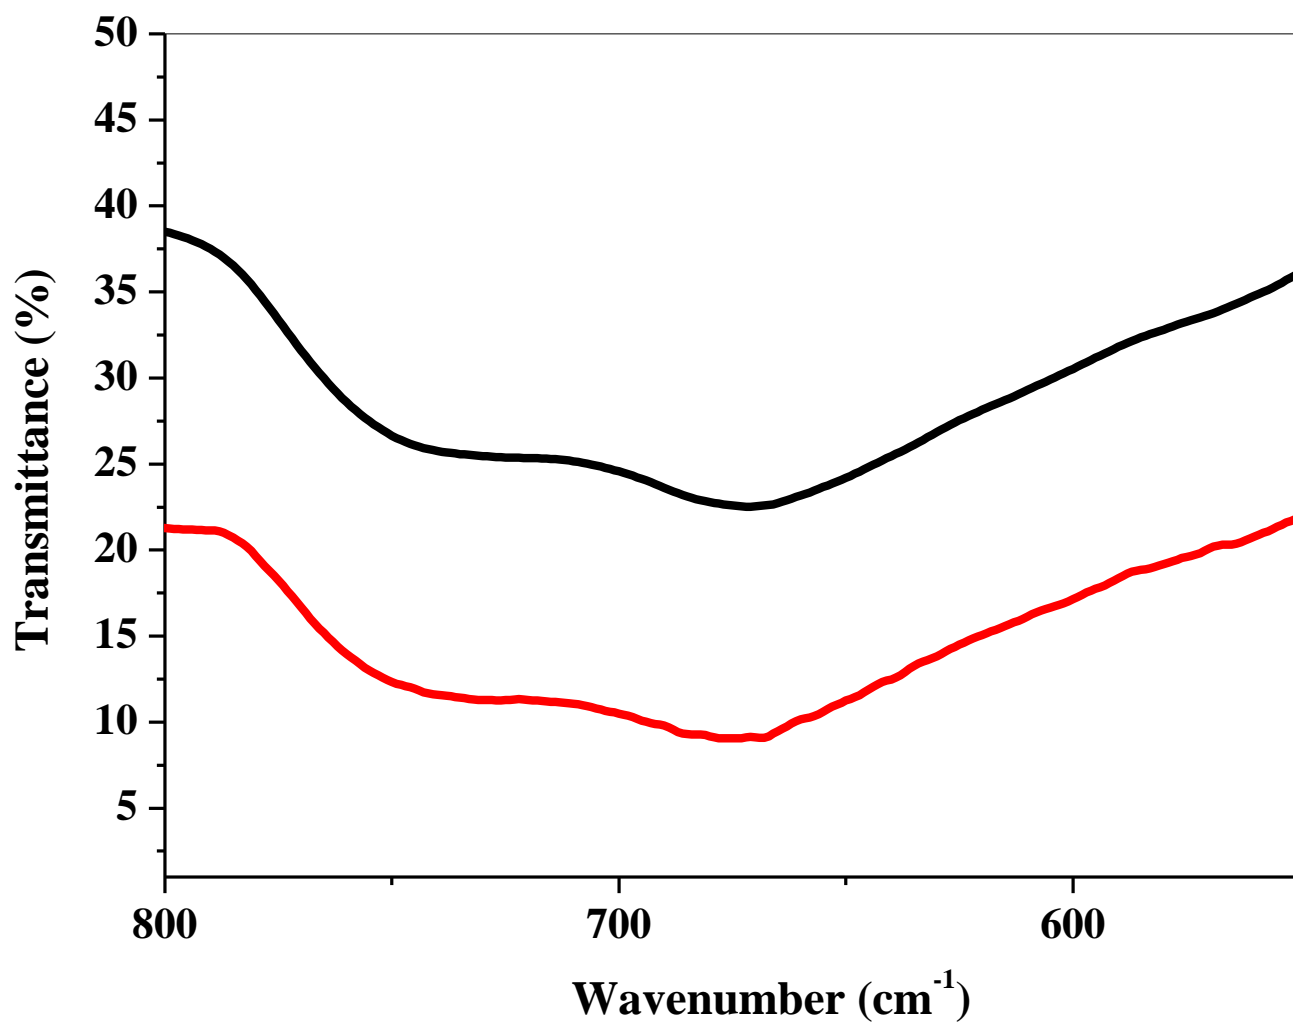

Fig. S10 DRIFT spectra of reference compound (black) and reference compound after 600 s (red).

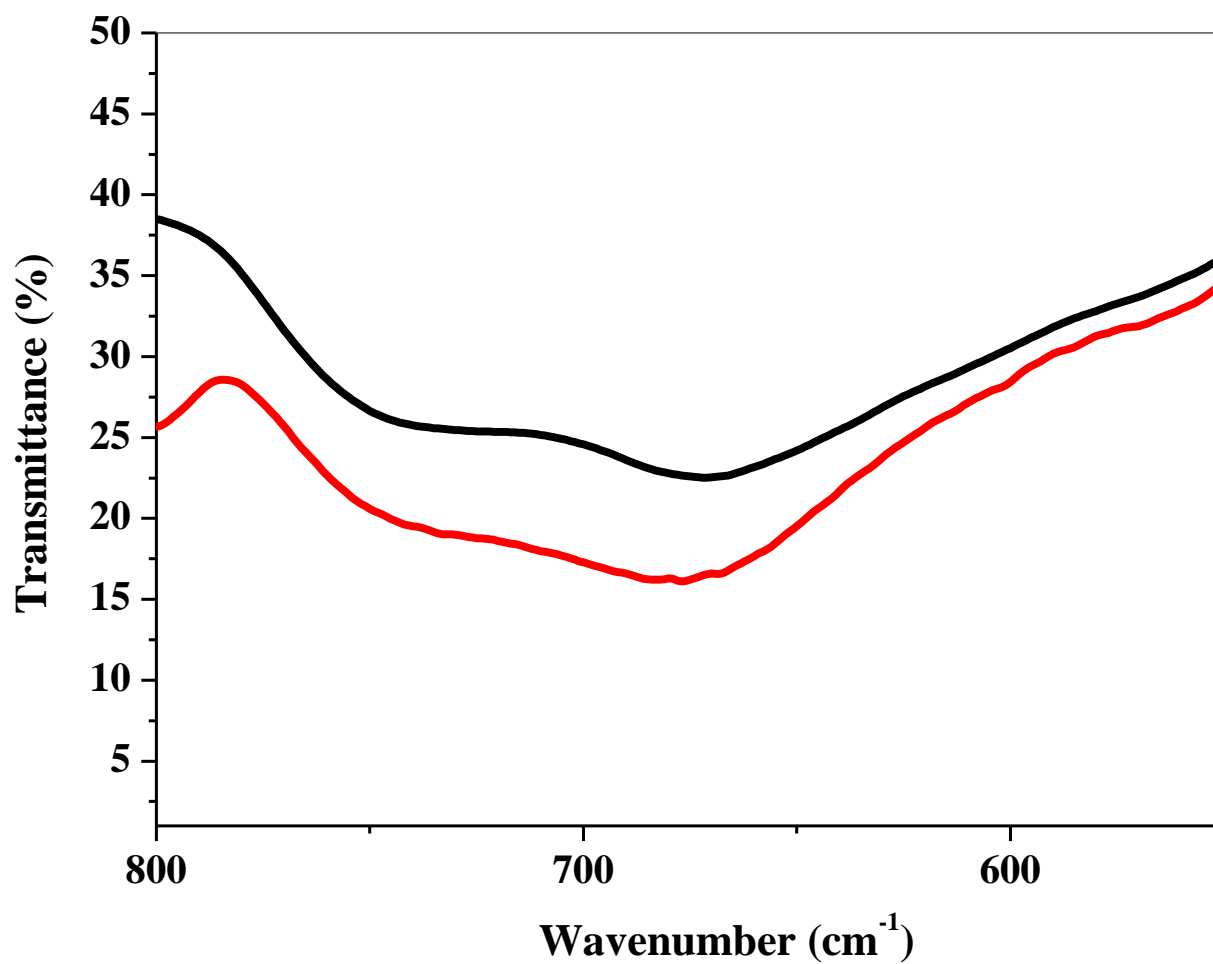

Fig. S11 DRIFT spectra of reference compound (black) and reference compound after 900 s (red).

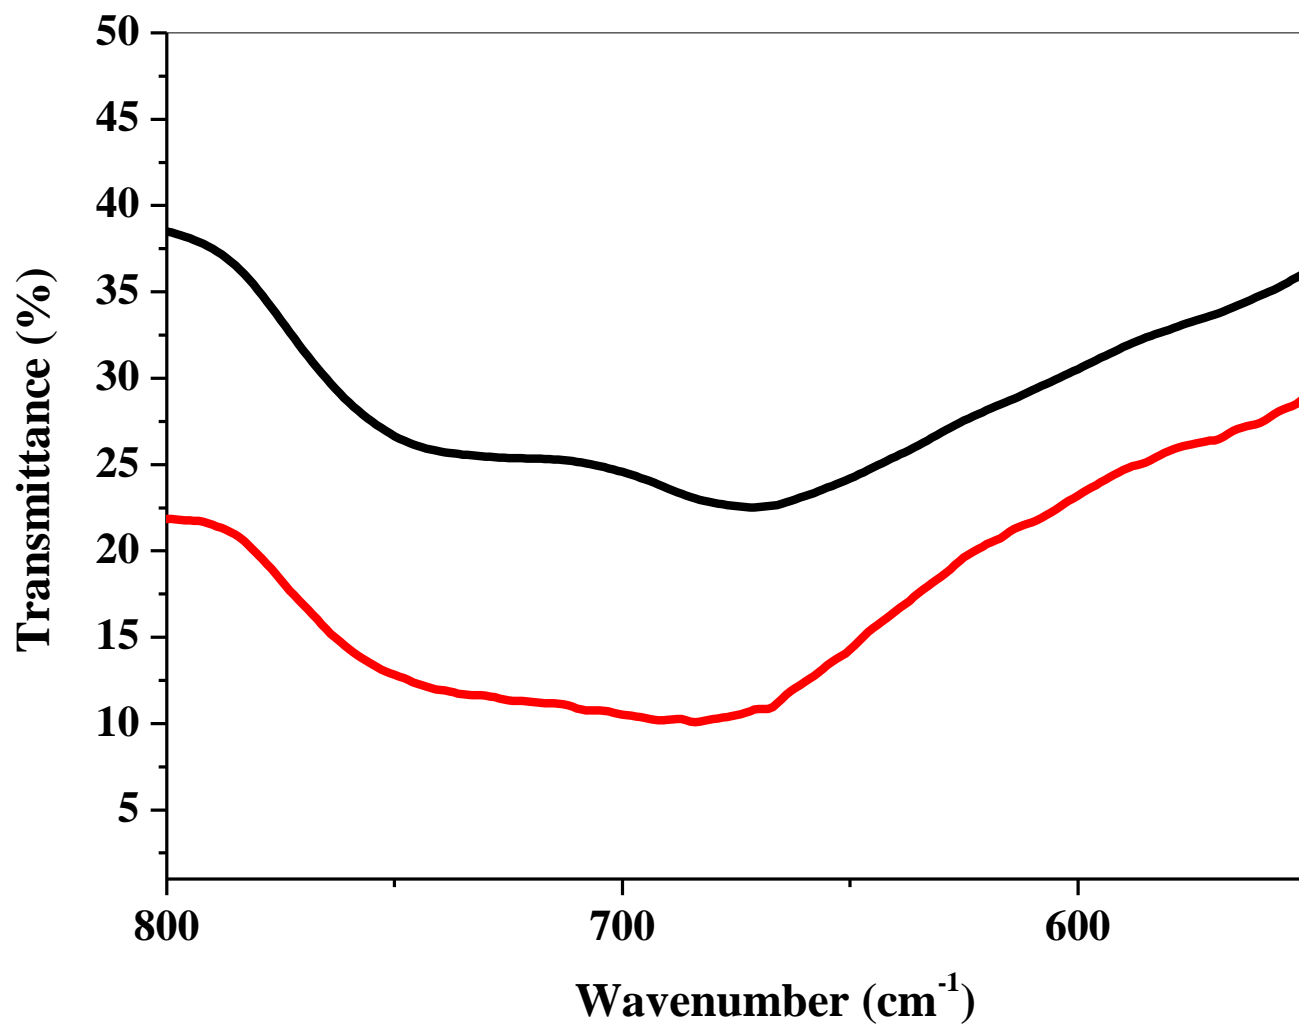

Fig. S12 DRIFT spectra of reference compound (black) and reference compound after 1800 s (red).

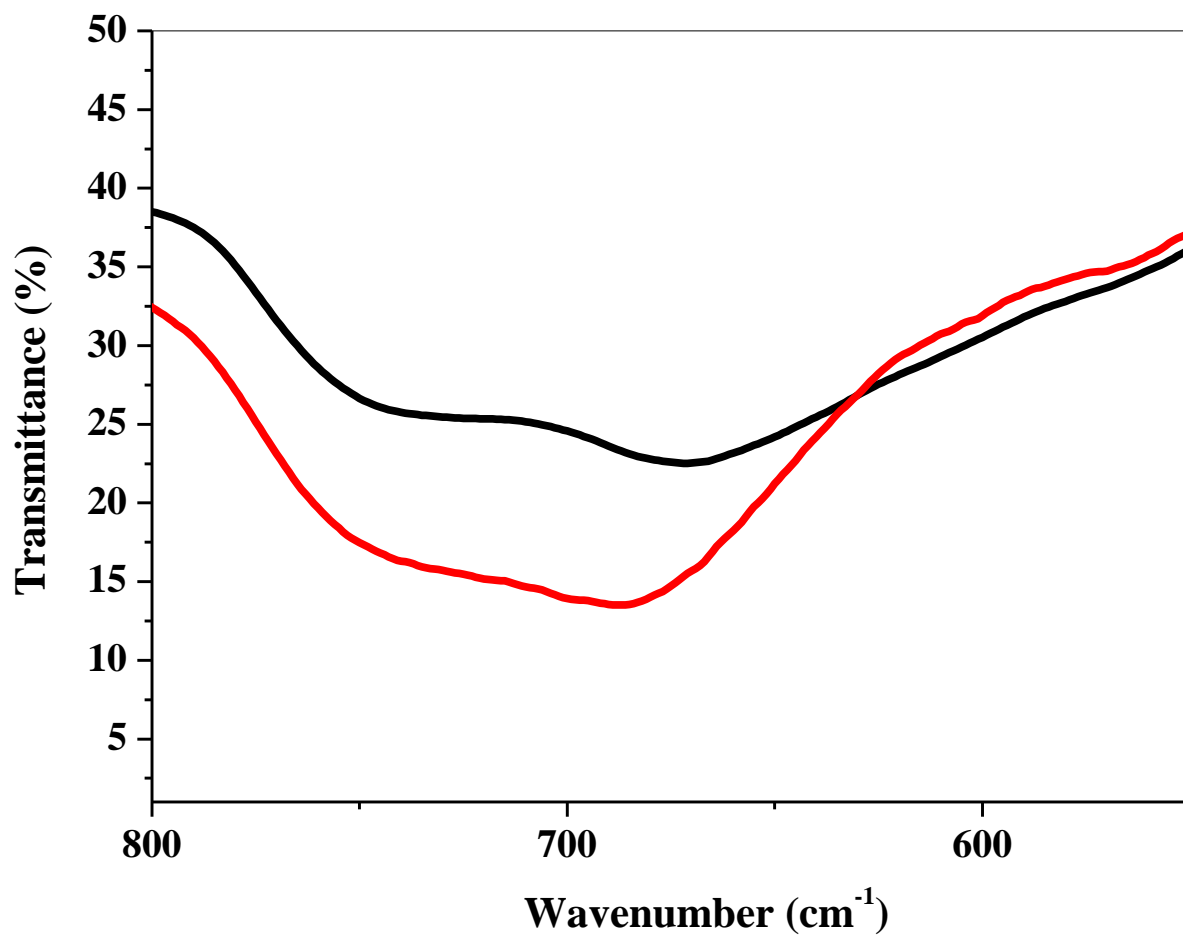

Fig. S13 DRIFT spectra of reference compound (black) and reference compound after 3 hours (red).

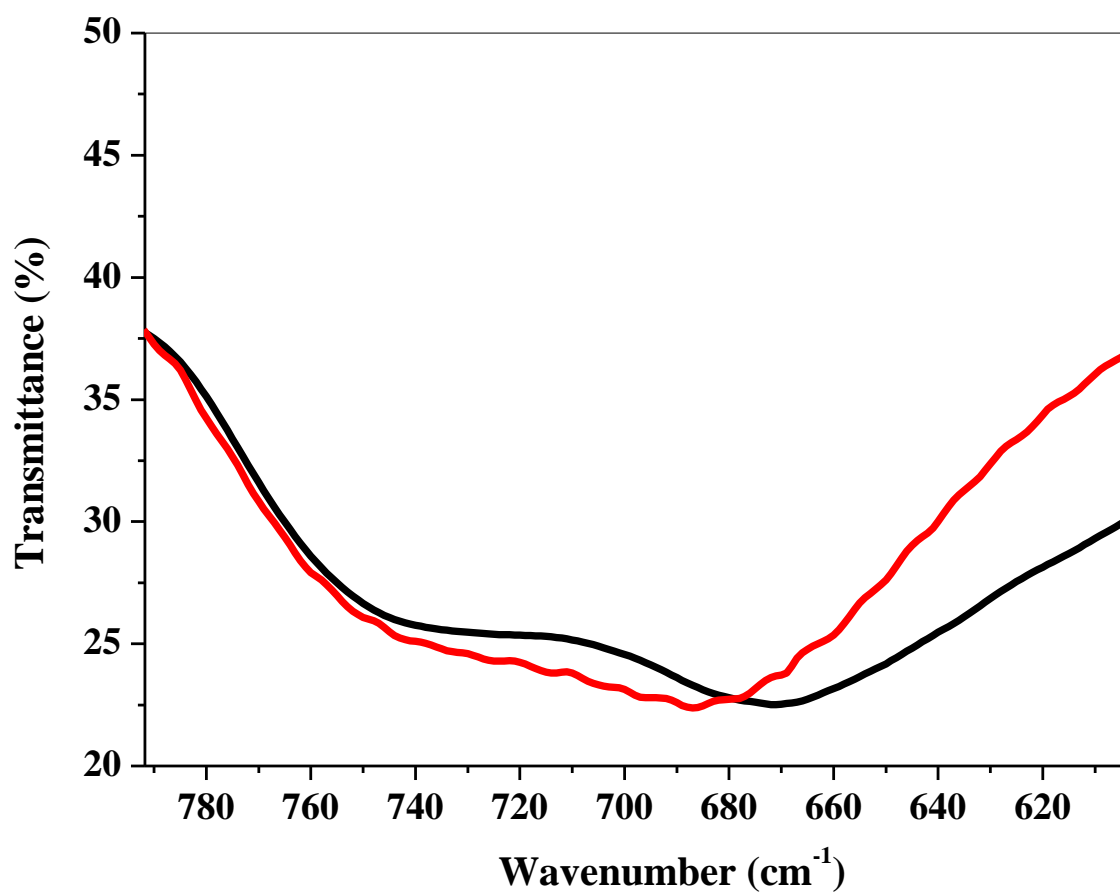

Fig. S13 DRIFT spectra of reference compound (black) and reference compound after 2 days (red).

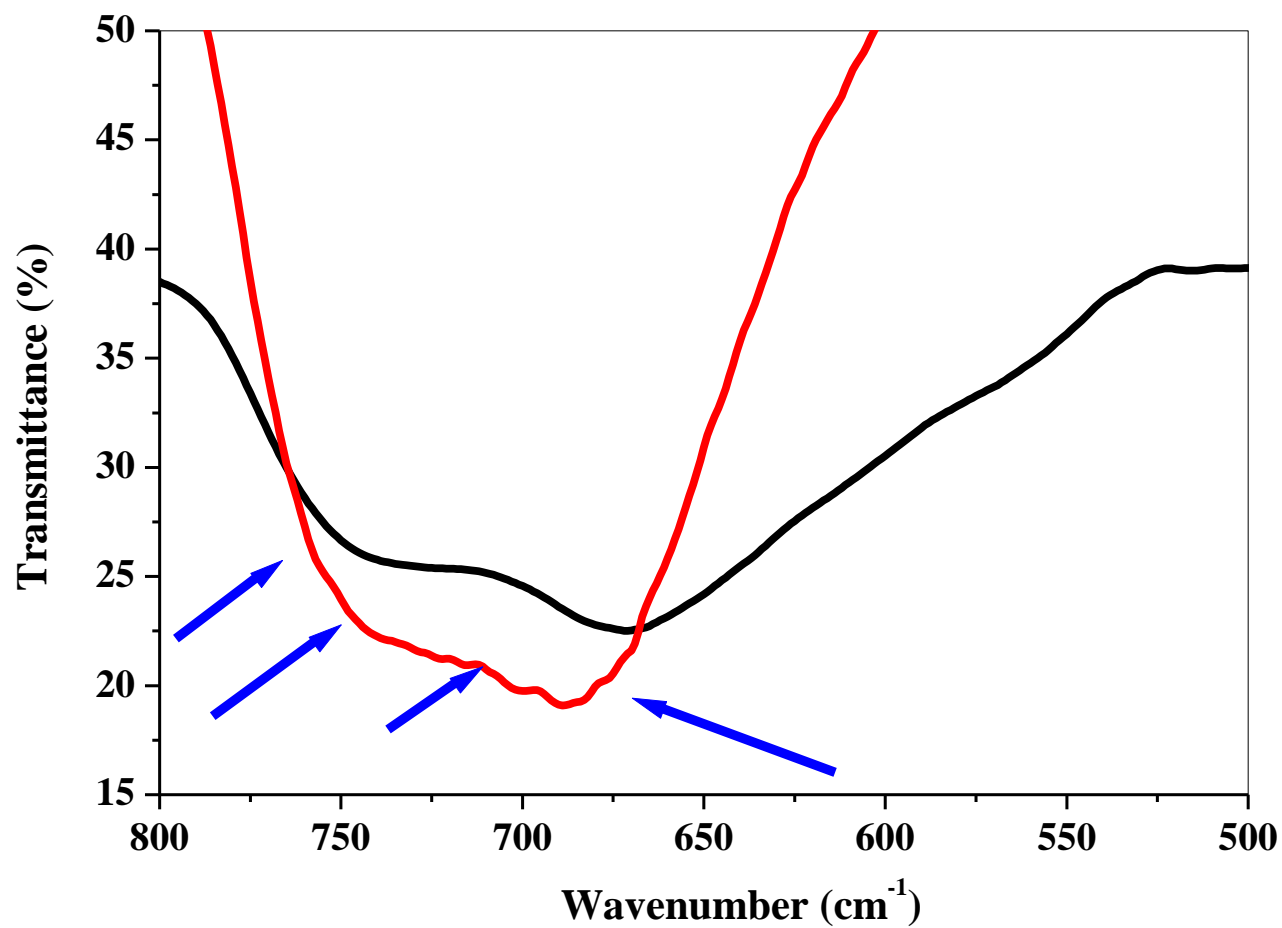

Fig. S14 DRIFT spectra of reference compound (black) and reference compound after one week (red). Blue arrows show new peaks related to <sup>18</sup>O in Mn oxide.

Table S1 Measured standard reduction potentials in aqueous solution (pH = 0) for water oxidation regarding different mechanisms ( $E_0$  vs. SHE). Data are from ref. S3

| Reaction                                                                                         | Standard $E_0$ |
|--------------------------------------------------------------------------------------------------|----------------|
| Four-Electron Reactions                                                                          |                |
| $2\text{H}_2\text{O} \rightarrow \text{O}_2 + 4\text{H}^+ + 4\text{e}^-$                         | 1.229          |
| $\text{OH}^- + \text{H}_2\text{O} \rightarrow \text{O}_2 + 3\text{H}^+ + 4\text{e}^-$            | 1.022          |
| $2\text{OH}^- \rightarrow \text{O}_2 + 2\text{H}^+ + 4\text{e}^-$                                | 0.815          |
| $4\text{OH}^- \rightarrow \text{O}_2 + \text{H}_2\text{O} + 4\text{e}^-$                         | 0.401          |
| Two-Electron Reactions                                                                           |                |
| $2\text{H}_2\text{O} \rightarrow \text{H}_2\text{O}_2 + 2\text{H}^+ + 2\text{e}^-$               | 1.776          |
| $2\text{OH}^- \rightarrow \text{H}_2\text{O}_2 + 2\text{e}^-$                                    | 0.948          |
| $\text{H}_2\text{O}_2 \rightarrow \text{O}_2 + 2\text{H}^+ + 2\text{e}^-$                        | 0.682          |
| $\text{H}_2\text{O}_2 + 2\text{OH}^- \rightarrow \text{O}_2 + 2\text{H}_2\text{O} + 2\text{e}^-$ | -0.146         |
| One-Electron Reactions                                                                           |                |
| $\text{H}_2\text{O} \rightarrow \text{OH} + \text{H}^+ + \text{e}^-$                             | 2.848          |
| $\text{OH}^- \rightarrow \text{OH} + \text{e}^-$                                                 | 2.020          |
| $\text{H}_2\text{O}_2 \rightarrow \text{HO}_2 + \text{H}^+ + \text{e}^-$                         | 1.495          |
| $\text{H}_2\text{O}_2 + \text{OH}^- \rightarrow \text{HO}_2 + \text{H}_2\text{O} + \text{e}^-$   | 0.667          |
| $\text{HO}_2 \rightarrow \text{O}_2 + \text{H}^+ + \text{e}^-$                                   | -0.130         |
| $\text{HO}_2 + \text{OH}^- \rightarrow \text{O}_2 + \text{H}_2\text{O} + \text{e}^-$             | -0.958         |

## References

- S1 M. M. Najafpour, D. Jafarian Sedigh, B. Pashaei and S. Nayeri, *New J. Chem.*, 2013, **37**, 2448.
- S2 D. Shevela, S. Koroidov, M. M. Najafpour, J. Messinger and P. Kurz, *Chem. Eur. J.*, 2011, **17**, 5415.
- S3 W. Ruettinger and G. C. Dismukes, *Chem. Rev.*, 1997, **97**, 1.
